# Supplementary material for: Estimation of ischemic core in acute ischemic stroke with CT angiography and non-contrast CT: Attenuation changes in ASPECTS regions vs. automated ASPECTS scoring
Source: Frontiers journal article supplement (doi:10.3389/fnins.2022.933753), 2022-07-26
Supplement: Data_Sheet_2.PDF [file Data_Sheet_2.PDF]

**Supplementary Material 2.** Correlation of Attenuation Changes in ASPECTS Regions on NCCT and CTA with Ischemic Core Volumes by Different Time Windows

| Time from onset to CT | NCCT/CTA | Rho   | <i>P</i> |
|-----------------------|----------|-------|----------|
| ≤ 4.5 hours (n = 39)  | NCCT     | 0.594 | <0.001   |
|                       | CTA      | 0.596 | <0.001   |
| > 4.5 hours (n = 34)  | NCCT     | 0.637 | <0.001   |
|                       | CTA      | 0.439 | 0.009    |

ASPECTS indicates Alberta Stroke Program Early CT Score
